# Supplementary material for: Characterization of Natural Killer Cell Profile in a Cohort of Infected Pregnant Women and Their Babies and Its Relation to CMV Transmission
Source: MDPI journal article supplement (doi:10.3390/v16050780), 2024-05-14
Supplement: s1 [file s1]

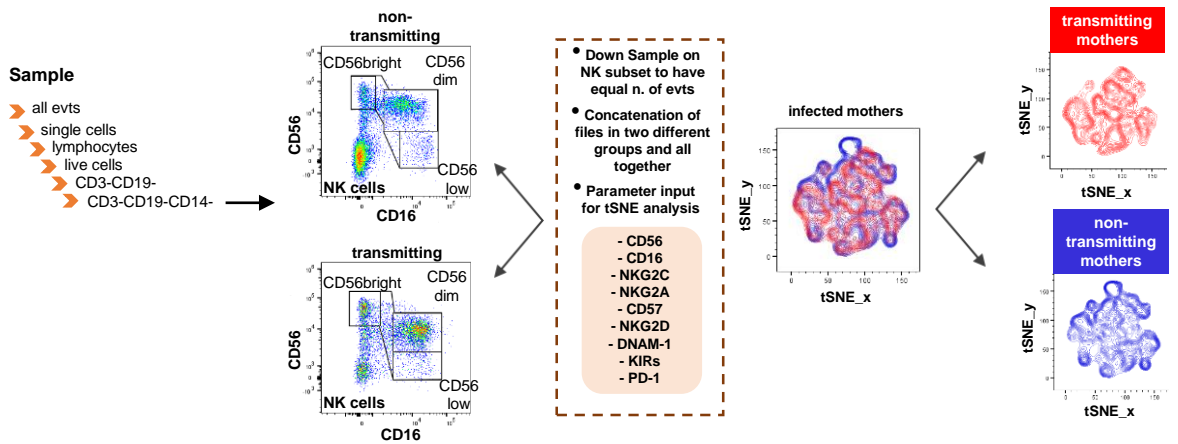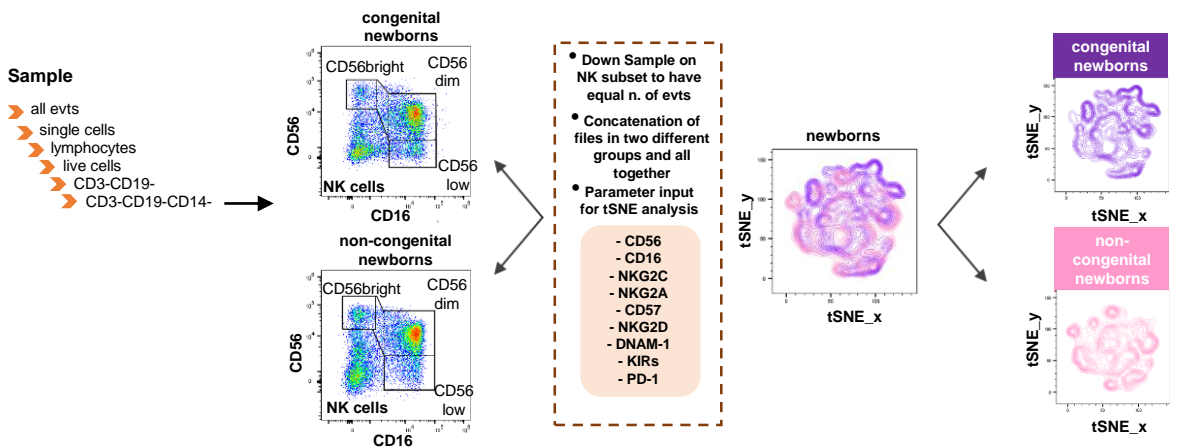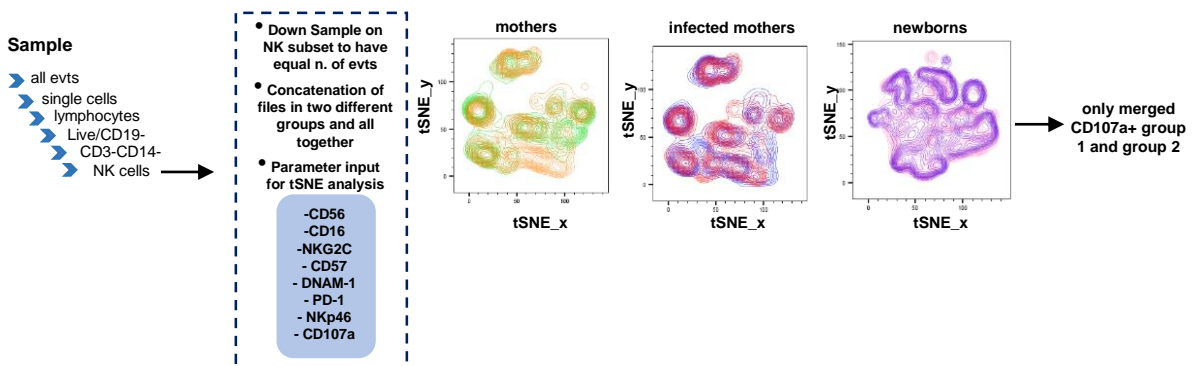

**Supplementary Figure S1. tSNE workflow for NK cell phenotype and degranulation.** tSNE was performed on the concatenated file using the “TSNE” plugin, being the maps generated using data from the following compensated parameters as input: CD56, CD16, NKG2C, NKG2A, NKG2D, DNAM-1, CD57, KIR2DL1/S1/S3/S5, KIR2DL2/L3 and PD-1 for the phenotype analysis and CD56, CD16, NKG2C, DNAM-1, CD57, NKp46, PD-1 and CD107a for the degranulation analysis.

**A**

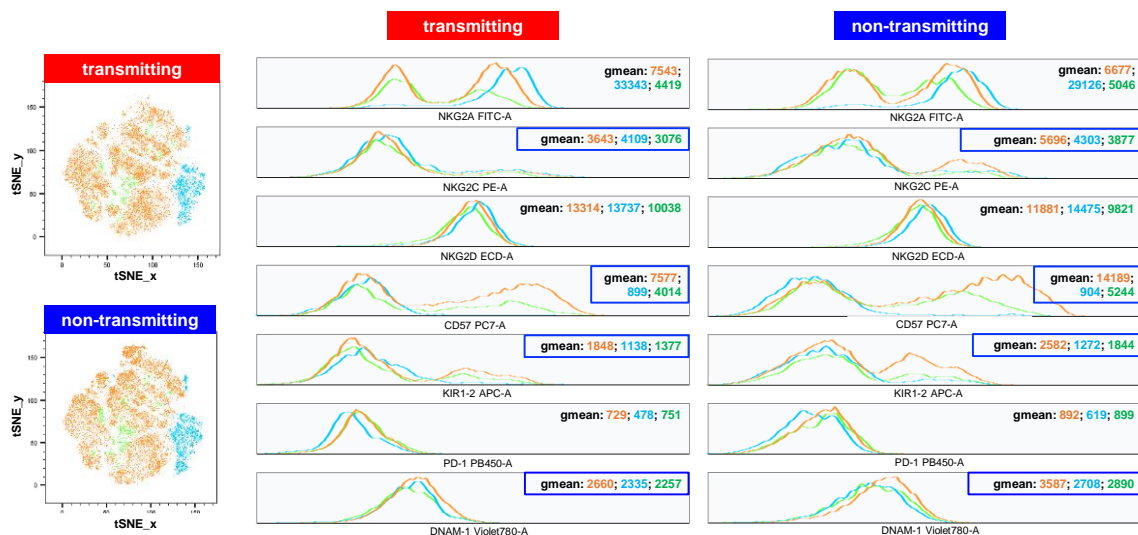

**B**

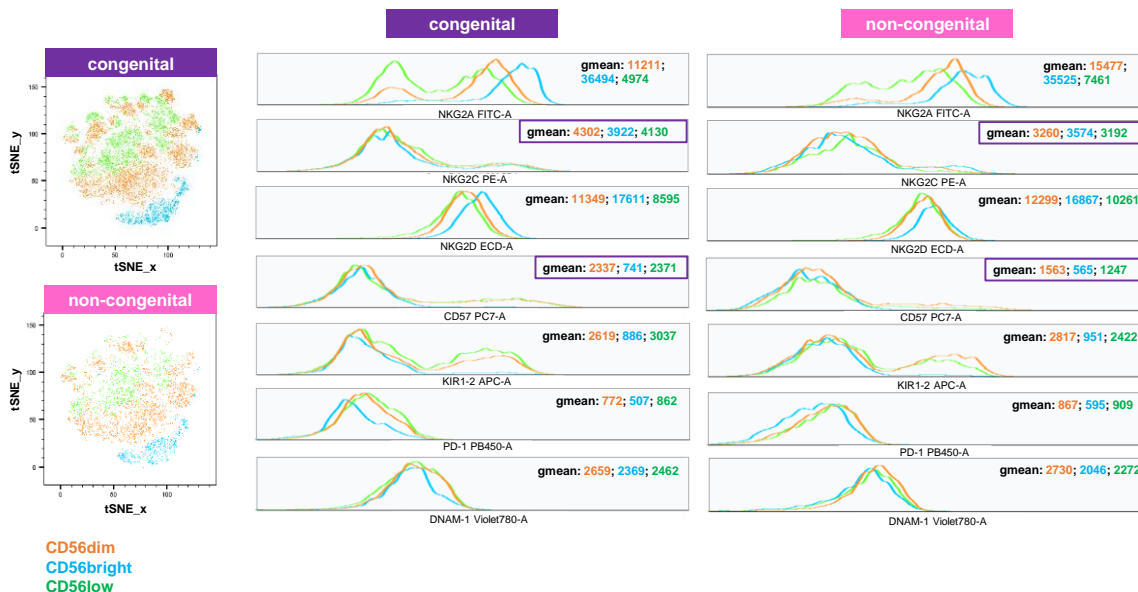

**Supplementary Figure S2. Phenotypic profile of CD56<sup>bright</sup>, CD56<sup>dim</sup> and CD56<sup>low</sup> cell populations.** Multigraph histogram overlays with geomean values for CD56<sup>bright</sup> (blue), CD56<sup>dim</sup> (orange) and CD56<sup>low</sup> (green) cells were generated with a combined FCS file obtained by concatenating (A) 2000 events in NK cell DownSample of transmitting (n=7, left panels) and non-transmitting (n=8, right panels) mothers or (B) 1880 events in NK cell DownSample of congenital (n=11, left panels) and non-congenital (n=5, right panels) newborns.

**A**

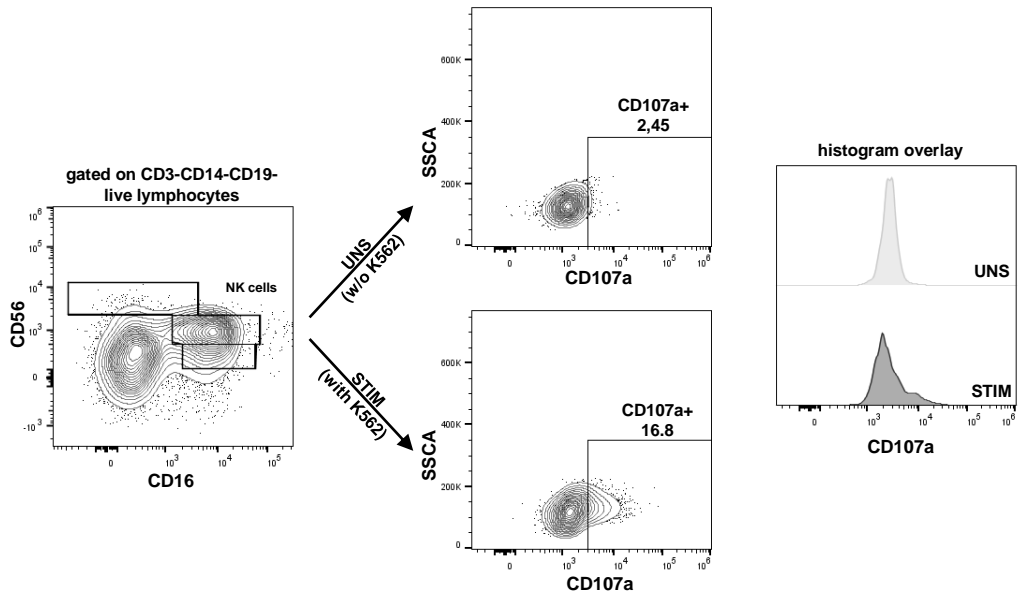

**B**

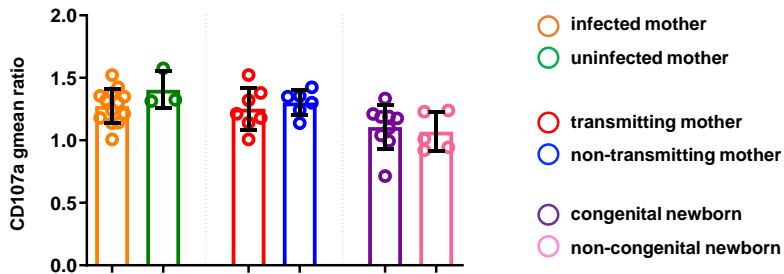

**Supplementary Figure S3. CD107a surface mobilization on NK cells.** Representative gating strategy for NK cell degranulation is shown in **panel A**. **(B)** Scatter plots with bar (mean  $\pm$  SD) depict CD107a geomean ratio (stimulated/not stimulated) of CMV-infected (orange dots,  $n=13$ ) and -uninfected (green dots,  $n=3$ ) pregnant women or transmitting (red dots,  $n=7$ ) and non-transmitting (blue dots,  $n=6$ ) mothers or congenital (purple dots,  $n=9$ ) and non-congenital (pink dots,  $n=5$ ) newborns. Mann Whitney test was used to assess differences between study groups. Significance was set at  $p < 0.05$ .
